# Supplementary material for: Real‐world, long‐term treatment patterns of commonly used biologics in Canadian patients with moderate‐to‐severe chronic plaque psoriasis
Source: PubMed Central journal article supplement (PMC9298415; doi:10.1111/1346-8138.16214), 2021-11-07

## Real-world, long-term treatment patterns of commonly used biologics in Canadian patients with moderate-to-severe chronic plaque psoriasis

Melinda J. GOODERHAM, Charles LYNDE, Irina TURCHIN, Miriam AVADISIAN, Melanie LABELLE, Kim A. PAPP

### Supplemental Tables

**Supplemental Table 1.** Summary of PsO Biologics Canadian On-Label Dosing

| PsO Biologic | Canadian On-Label Dosing                                                                                                                                 | Product Entry on the Canadian Market for PsO Treatment |
|--------------|----------------------------------------------------------------------------------------------------------------------------------------------------------|--------------------------------------------------------|
| Etanercept   | 50 mg twice weekly for 3 months, then 50 mg ew                                                                                                           | 2004                                                   |
| Infliximab   | 5 mg/kg wk 0, 2, 6 then Q8W                                                                                                                              | 2006                                                   |
| Adalimumab   | 80 mg wk 0, 40 mg Q2W starting at wk 1                                                                                                                   | 2008                                                   |
| Ustekinumab  | 45 mg for <100 kg; 90 mg for >100 kg; wk 0, 4 then Q12W;<br>for patients who inadequately respond to Q12W, consideration<br>may be given to treating Q8W | 2009                                                   |
| Secukinumab  | 300 mg wk 0, 1, 2, 3, and 4 then monthly dosing                                                                                                          | 2015                                                   |
| Ixekizumab   | 160 mg wk 0, then 80 mg wk 2, 4, 6, 8,10,12 then 80 mg Q4W                                                                                               | 2016                                                   |
| Brodalumab   | 210 mg wk 0, 1, 2 then Q2W                                                                                                                               | 2018                                                   |
| Guselkumab   | 100 mg wk 0, 4 then Q8W                                                                                                                                  | 2018                                                   |

EW, every week; PsO, psoriasis; Q2W, every 2 weeks; Q4W, every 4 weeks; Q8W, every 8 weeks; Q12W, every 12 weeks; wk, week.

**Supplemental Table 2.** Non-biologic treatments for psoriasis taken by more than 1% of patients in decreasing order - By WHO-DD

| ATC Chemical Subgroup                                            | Non-Biologics          |                      |
|------------------------------------------------------------------|------------------------|----------------------|
|                                                                  | Patients<br>(n = 1149) | Events<br>(n = 5315) |
| All non-biologic treatments                                      | 1049<br>(91.3%)        | 5315<br>(100.0%)     |
| Other antipsoriatics for topical use                             | 584 (50.8%)            | 923 (17.4%)          |
| Other immunosuppressants                                         | 506 (44.0%)            | 764 (14.4%)          |
| Corticosteroids, potent (group III)                              | 421 (36.6%)            | 802 (15.1%)          |
| Corticosteroids, very potent (group IV)                          | 365 (31.8%)            | 525 (9.9%)           |
| All other therapeutic products - Not available                   | 315 (27.4%)            | 449 (8.4%)           |
| Retinoids for treatment of psoriasis                             | 263 (22.9%)            | 317 (6.0%)           |
| Corticosteroids, weak (group I)                                  | 159 (13.8%)            | 184 (3.5%)           |
| Selective immunosuppressants                                     | 145 (12.6%)            | 159 (3.0%)           |
| Calcineurin inhibitors                                           | 130 (11.3%)            | 202 (3.8%)           |
| Agents for dermatitis, excluding corticosteroids                 | 119 (10.4%)            | 148 (2.8%)           |
| Corticosteroids, potent, other combinations                      | 108 (9.4%)             | 122 (2.3%)           |
| Corticosteroids, moderately potent (group II)                    | 73 (6.4%)              | 83 (1.6%)            |
| Tars                                                             | 68 (5.9%)              | 93 (1.7%)            |
| Folic acid and derivatives                                       | 44 (3.8%)              | 49 (0.9%)            |
| Glucocorticoids                                                  | 44 (3.8%)              | 100 (1.9%)           |
| Imidazole and triazole derivatives                               | 39 (3.4%)              | 46 (0.9%)            |
| Corticosteroids, dermatological preparations – Not available     | 30 (2.6%)              | 30 (0.6%)            |
| Other antifungals for topical use                                | 29 (2.5%)              | 29 (0.5%)            |
| Salicylic acid preparations                                      | 23 (2.0%)              | 25 (0.5%)            |
| Uncoded – Not available                                          | 21 (1.8%)              | 21 (0.4%)            |
| Agents for dermatitis, excluding corticosteroids – Not available | 20 (1.7%)              | 24 (0.5%)            |
| Soft paraffin and fat products                                   | 16 (1.4%)              | 17 (0.3%)            |
| Other antibiotics for topical use                                | 14 (1.2%)              | 15 (0.3%)            |
| Corticosteroids, very potent, other combinations                 | 14 (1.2%)              | 18 (0.3%)            |
| Medicated shampoos                                               | 14 (1.2%)              | 15 (0.3%)            |
| Piperazine derivatives                                           | 13 (1.1%)              | 14 (0.3%)            |
| Corticosteroids, plain                                           | 13 (1.1%)              | 13 (0.2%)            |

ATC Chemical Subgroup "Not Available" meant that medication's chemical subgroup was not available in WHO-DD. Concomitant Medications were coded using WHO-DD C3 SEP 2019.

ATC, Anatomical Therapeutic Chemical; WHO-DD, World Health Organizations Drug Dictionary

**Supplemental Table 3.** Biologic treatments for psoriasis - By WHO-DD

| <b>ATC therapeutic class<br/>ATC chemical subgroup</b> | <b>Patients<br/>(n = 1149)</b> | <b>Events<br/>(n = 2659)</b> |
|--------------------------------------------------------|--------------------------------|------------------------------|
| <b>All biologic treatments</b>                         | 1149 (100.0%)                  | 2659 (100.0%)                |
| <b>Antineoplastic agents</b>                           | 6 (0.5%)                       | 6 (0.2%)                     |
| Monoclonal antibodies                                  | 5 (0.4%)                       | 5 (0.2%)                     |
| Protein kinase inhibitors                              | 1 (0.1%)                       | 1 (0.0%)                     |
| <b>Antipsoriatics</b>                                  | 4 (0.3%)                       | 4 (0.2%)                     |
| Not available                                          | 4 (0.3%)                       | 4 (0.2%)                     |
| <b>Immunosuppressants</b>                              | 1149 (100.0%)                  | 2643 (99.4%)                 |
| Interleukin inhibitors                                 | 818 (71.2%)                    | 1483 (55.8%)                 |
| Selective immunosuppressants                           | 42 (3.7%)                      | 52 (2.0%)                    |
| TNF- $\alpha$ inhibitors                               | 609 (53.0%)                    | 1108 (41.7%)                 |
| <b>Investigational drug</b>                            | 5 (0.4%)                       | 6 (0.2%)                     |
| Not available                                          | 5 (0.4%)                       | 6 (0.2%)                     |

Biologic treatments were coded using WHO-DD C3 September 2019.

ATC, anatomical therapeutic chemical; TNF, tumor necrosis factor; WHO-DD, World Health Organisation Drug Dictionary.

**Supplemental Table 4.** Line of biologic treatments for psoriasis

| <b>FAS</b><br><b>(n = 1149)</b>      |             |
|--------------------------------------|-------------|
| <b>Number of biologic treatments</b> |             |
| Mean (SD)                            | 1.4 (0.86)  |
| Median                               | 1.0         |
| Min, max                             | 1, 7        |
| <b>Lines of treatment</b>            |             |
| 1                                    | 833 (72.5%) |
| 2                                    | 190 (16.5%) |
| 3                                    | 85 (7.4%)   |
| 4                                    | 29 (2.5%)   |
| 5                                    | 5 (0.4%)    |
| 6                                    | 5 (0.4%)    |
| 7                                    | 2 (0.2%)    |

FAS, full analysis set; SD, standard deviation.

## Supplemental Figure Legends

**Supplemental Figure 1.** Time to first treatment change overall; change including switching, discontinuation, dose escalation, and interval change (both increasing and decreasing). CI, confidence interval.

**Supplemental Figure 2.** Time to first treatment change; change including switching, discontinuation, dose escalation, and interval change (both increasing and decreasing) – Sensitivity analysis. (a) Overall. (b) By biologics as first line of treatment.

**Supplemental Figure 3.** Drug survival by biologic. Drug survival defined as the number of days until discontinuation of a biologic. Diamond symbols indicate censored patients; treatment for these patient was ongoing at the time of chart review. Brodalumab is not shown due to the low number of patients using it ( $n = 4$ ). NA, not available.

# Supplemental Figure 1

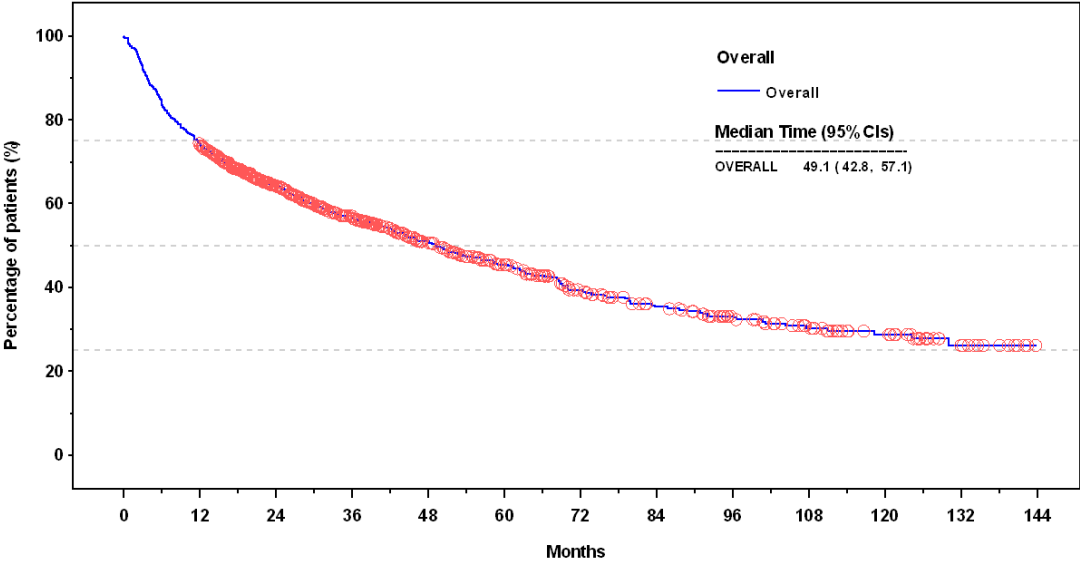

# Supplemental Figure 2

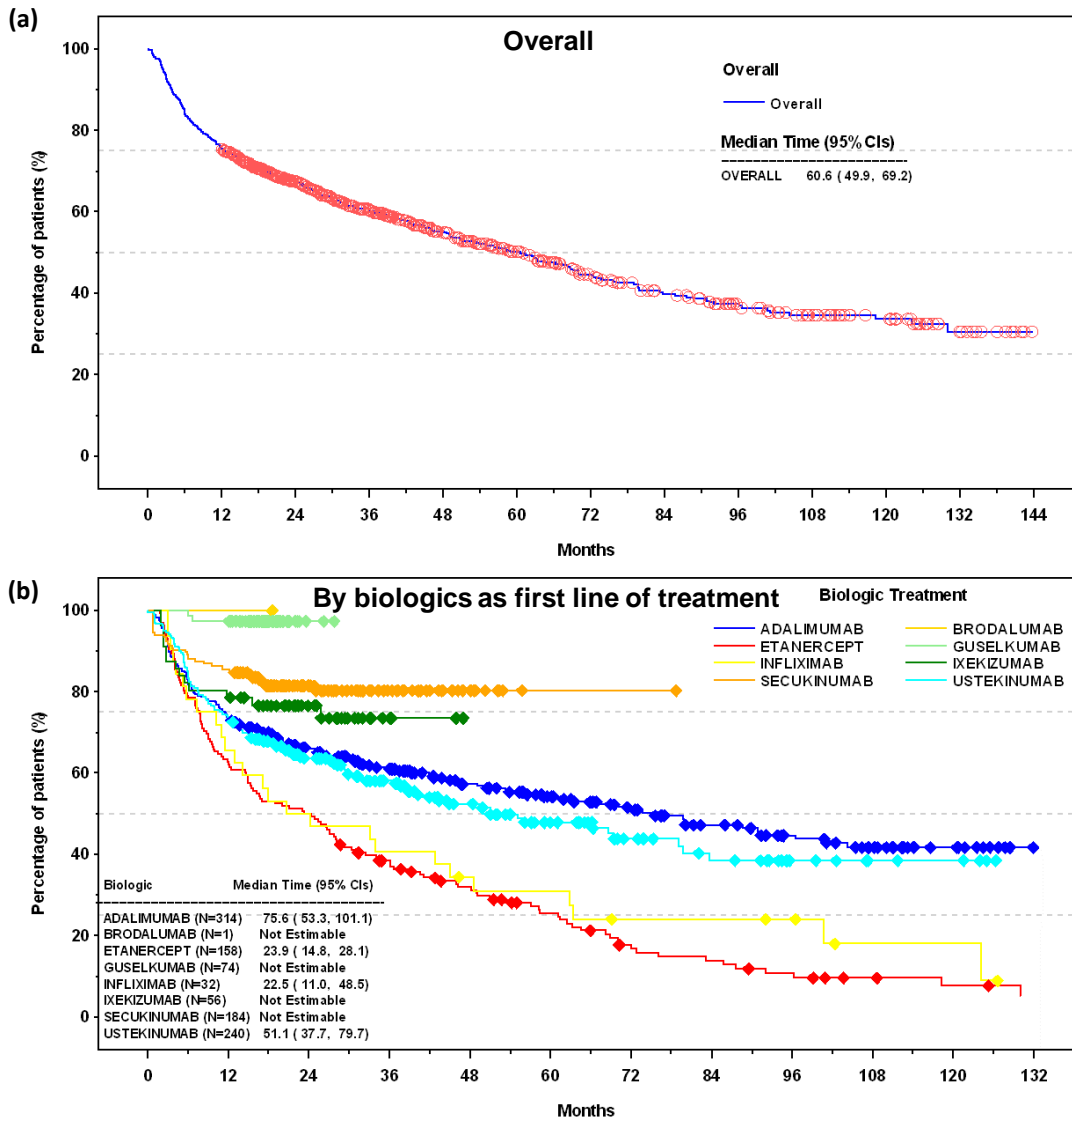

# Supplemental Figure 3

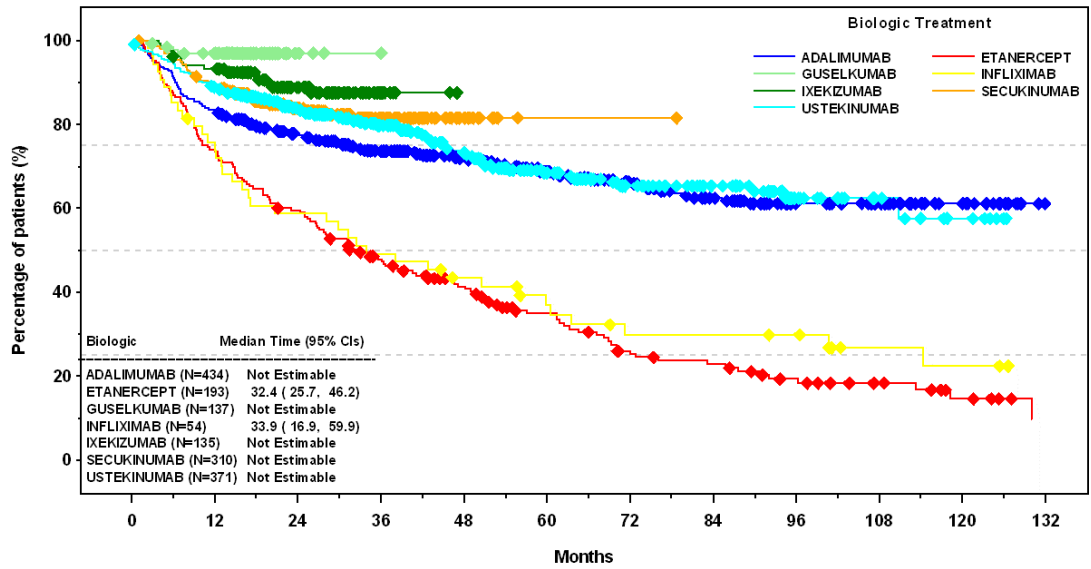

Supplement: JDE-49-95-s001.pdf [file JDE-49-95-s001.pdf]
